# Supplementary material for: Ginseng® Alleviates Malathion-Induced Hepatorenal Injury through Modulation of the Biochemical, Antioxidant, Anti-Apoptotic, and Anti-Inflammatory Markers in Male Rats
Source: MDPI journal article supplement (doi:10.3390/life12050771), 2022-05-23
Supplement: s1 [file s1]

Table S1. Primers for gene expression by RT-PCR

| Gene          | Direction | Primer sequence               | Accession number |
|---------------|-----------|-------------------------------|------------------|
| <i>Bax</i>    | Sense     | GGCGAATTGGCGATGAACTG          | NM_017059.2      |
|               | Antisense | ATGGTTCTGATCAGCTCGGG          |                  |
| <i>Bcl-2</i>  | Sense     | GATTGTGGCCTTCTTTGAGT          | NM_016993.1      |
|               | Antisense | ATAGTTCCACAAAGGCATCC          |                  |
| <i>GAPDH</i>  | Sense     | TCAAGAAGGTGGTGAAGCAG          | NM_017008.4      |
|               | Antisense | AGGTGGAAGAATGGGAGTTG          |                  |
| IL-1 $\beta$  | Sense     | ACC CAA GCA CCT TCT TTT CCT T | NM_031512.2      |
|               | Antisense | ACG GGA AAC CCA TCA CCA T     |                  |
| <i>HMOX1</i>  | Sense     | AGCATGTCCCAGGATTTGTC          | NM_012580.2      |
|               | Antisense | TCACCAGCTTAAAGCCTTCC          |                  |
| <i>NRF2</i>   | Sense     | TTGTAGATGACCATGAGTCGC         | NM_031789        |
|               | Antisense | TGTCCTGCTGTATGCTGCTT          |                  |
| IFN- $\gamma$ | Sense     | AGGTGAACAACCCACAGAT           | NM_138880.3      |
|               | Antisense | CTTCTTATTGGCACACTCTCTAC       |                  |

*Bax*, Bcl-2-associated X protein. *Bcl-2*, B-cell lymphoma 2. *GAPDH*, glyceraldehyde-3-phosphate dehydrogenase. Nuclear factor, erythroid derived 2, like 2 (Nrf2) 1. IFN- $\gamma$ , Interferon-gamma. *HMOX1*, Haemoxygenase-1.
